# Supplementary material
Source: Royal Society of Chemistry journal article supplement (doi:10.1039/d6nr00536e)
Supplement: d6nr00536e1.pdf [file d6nr00536e1.pdf]

## Electronic Supplementary Information

### Surface engineering of nano silicon via in-situ copolymer grafting for lithium ion batteries

Yuanzhi Liu<sup>a, ‡</sup>, Mochou Liu<sup>b, ‡</sup>, Cheng Lian<sup>b</sup>, Haiping Su<sup>b, \*</sup>, Xia Han<sup>b, \*</sup>, Honglai Liu

<sup>a, b</sup>

<sup>a</sup> State Key Laboratory of Chemical Engineering and Low-Carbon Technology, School of Chemical Engineering, East China University of Science and Technology, Shanghai 200237, P. R. China

<sup>b</sup> School of Chemistry and Molecular Engineering, East China University of Science and Technology, Shanghai, 200237, P. R. China

<sup>‡</sup> These authors contribute equally to this work.

\*Email: [hpsu@ecust.edu.cn](mailto:hpsu@ecust.edu.cn), [xhan@ecust.edu.cn](mailto:xhan@ecust.edu.cn)

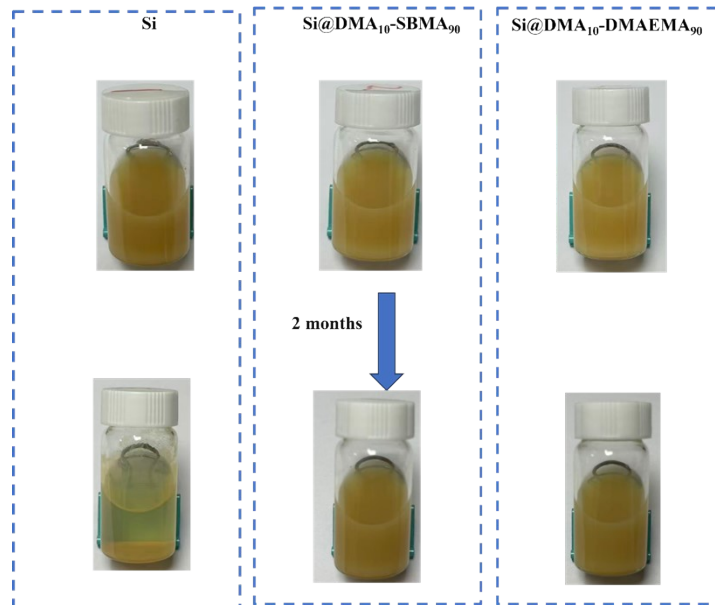

Fig. S1 Digital photographs of Si, Si@DMA<sub>10</sub>-DMAEMA<sub>90</sub>, Si@DMA<sub>10</sub>-SBMA<sub>90</sub> dispersions before and after standing for 2 months.

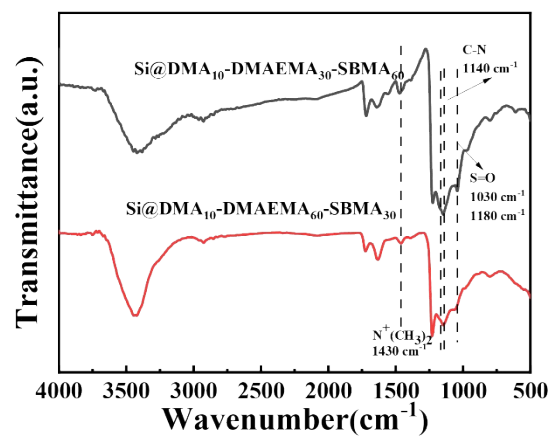

Fig. S2 FT-IR spectra of Si@DMA<sub>10</sub>-DMAEMA<sub>30</sub>-SBMA<sub>60</sub> and Si@DMA<sub>10</sub>-DMAEMA<sub>60</sub>-SBMA<sub>30</sub>.

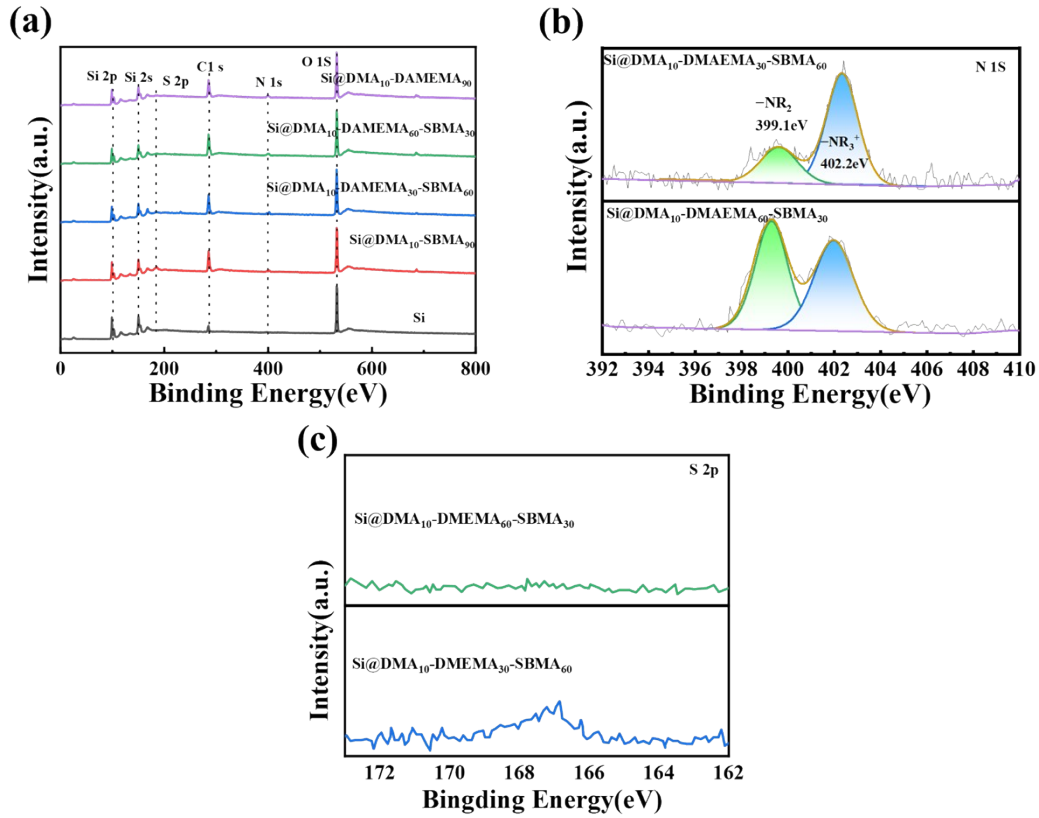

Fig. S3 (a) XPS spectra of bare Si, Si@DMA<sub>10</sub>-SBMA<sub>90</sub>, Si@DMA<sub>10</sub>-DMAEMA<sub>30</sub>-SBMA<sub>60</sub> and Si@DMA<sub>10</sub>-DMAEMA<sub>60</sub>-SBMA<sub>30</sub>, Si@DMA<sub>10</sub>-DMAEMA<sub>90</sub>; N 1s (b) and S 2P (c) high-resolution spectra of Si@DMA<sub>10</sub>-DMAEMA<sub>30</sub>-SBMA<sub>60</sub> and Si@DMA<sub>10</sub>-DMAEMA<sub>60</sub>-SBMA<sub>30</sub>.

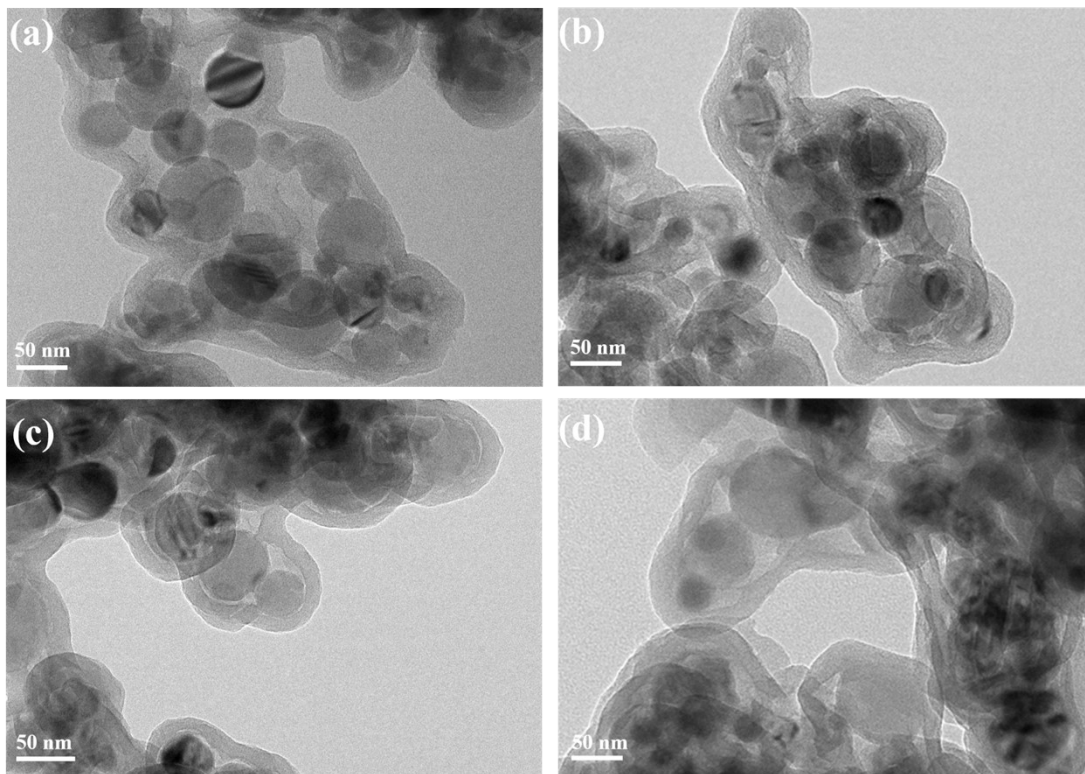

Fig. S4 TEM images of Si@Void@C with different copolymer modification of (a) Si@DMA<sub>10</sub>-SBMA<sub>90</sub>, (b) Si@DMA<sub>10</sub>-DMAEMA<sub>30</sub>-SBMA<sub>60</sub>, (c) Si@DMA<sub>10</sub>-DMAEMA<sub>60</sub>-SBAMA<sub>30</sub>, and (d) Si@DMA<sub>10</sub>-DMAEMA<sub>90</sub>.

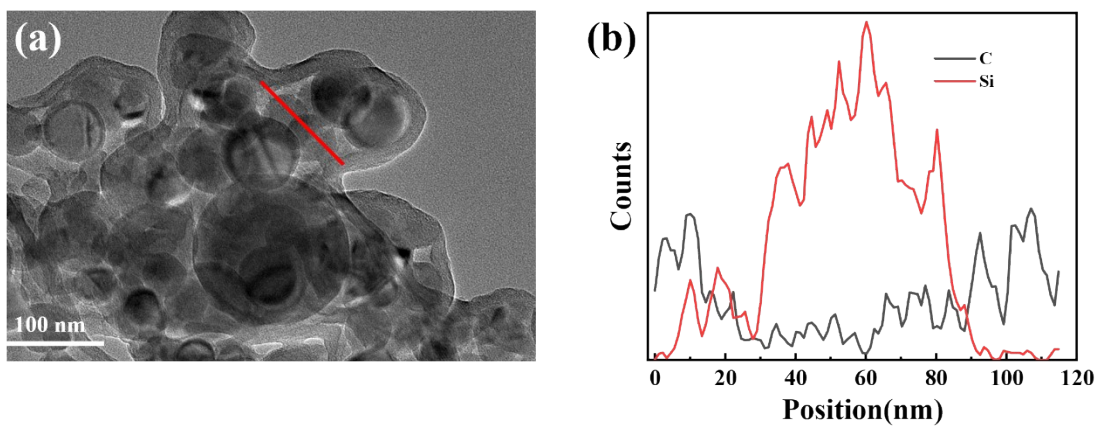

Fig. S5 (a) TEM image of Si@void@C and (b) Elemental line-scanning profiles measured along the orange line.

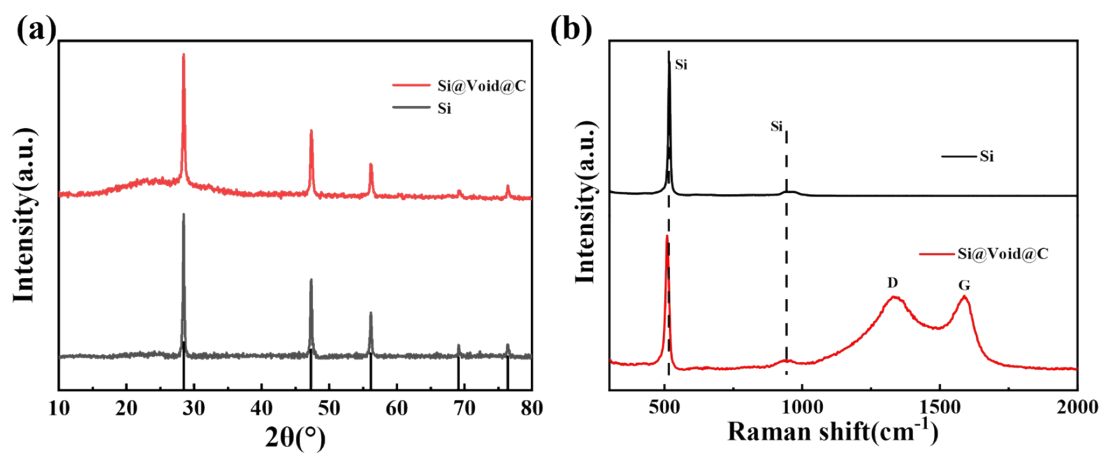

Fig. S6 (a) XRD and (b) Raman patterns of Si, Si@Void@C.

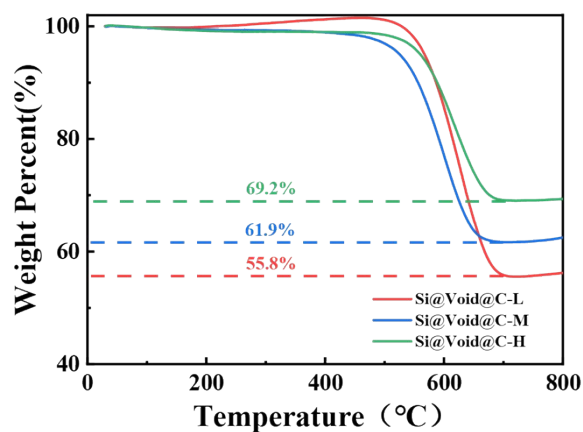

Fig. S7 TGA curves of Si@Void@C-L, Si@Void@C-M and Si@Void@C-H.

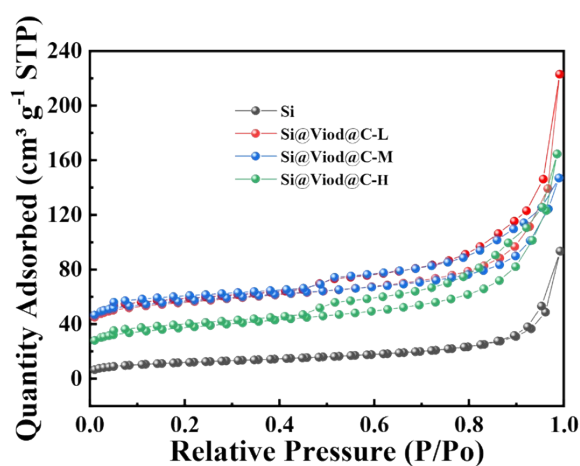

Fig.S8 N<sub>2</sub> adsorption/desorption isotherms of Si, Si@Void@C-L, C@Void@Si-M and C@Void@Si-H.

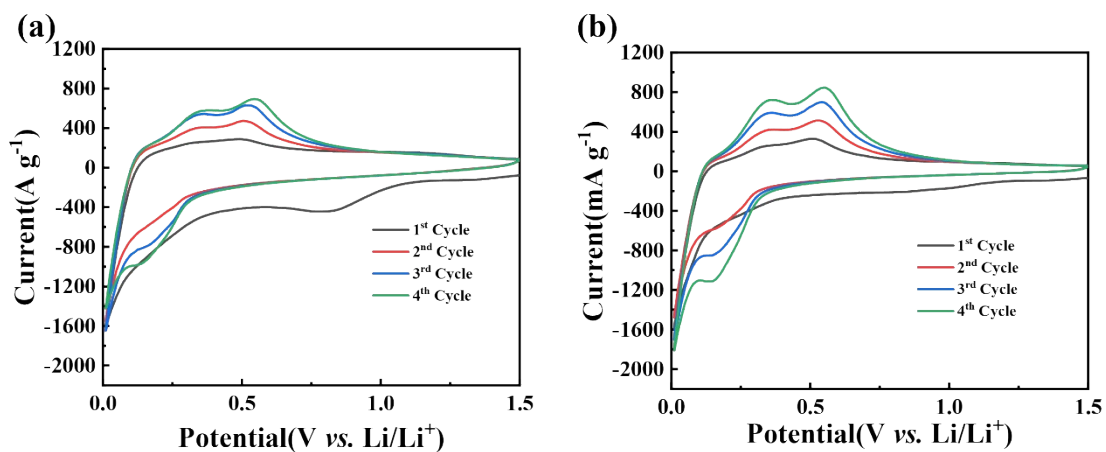

Fig. S9 CV curves of (a) Si@Void@C-L and (b) Si@Void@C-H.

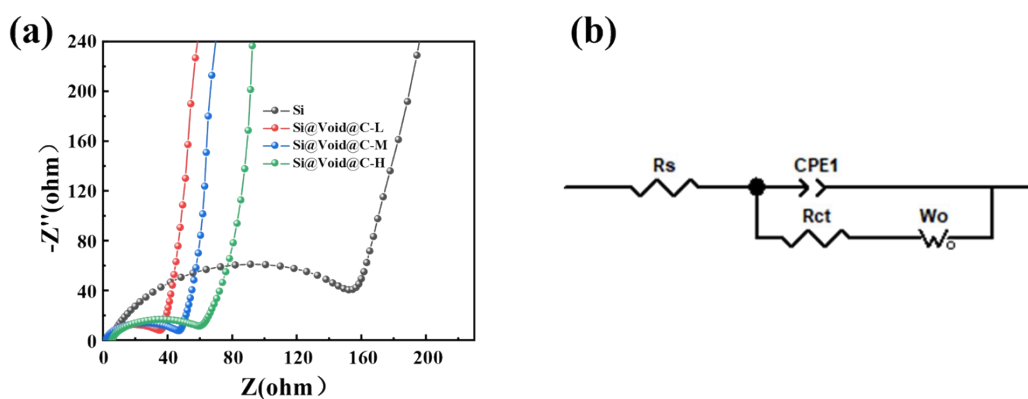

Fig. S10 (a) The corresponding Nyquist plots after fitting different electrodes and (b) equivalent circuit.

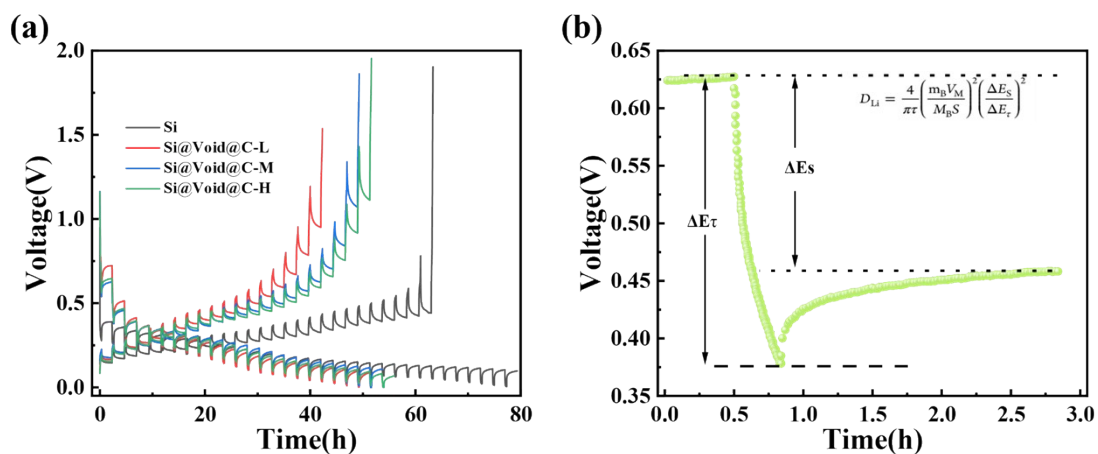

Fig. S11 (a) GITT curves of Si, Si@Void@C-L, C@Void@Si-M, C@Void@Si-H; (b) GITT test schematic diagram.

The  $\text{Li}^+$  diffusion coefficients were determined using the indicated calculation formula, where  $m_B$ ,  $M_B$ ,

and  $V_M$  denote the mass, molar mass, and molar volume of active material;  $\tau$  is the current pulse duration;  $S$  is the electrode surface area;  $\Delta E_s$  and  $\Delta E_\tau$  represent steady-state and transient voltage changes.

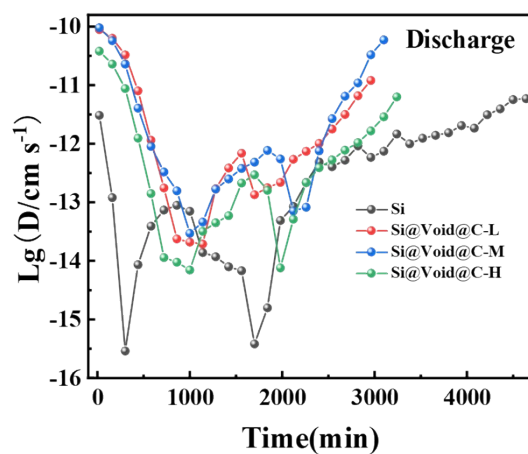

Fig. S12 Discharge ionic conductivity of the electrodes.

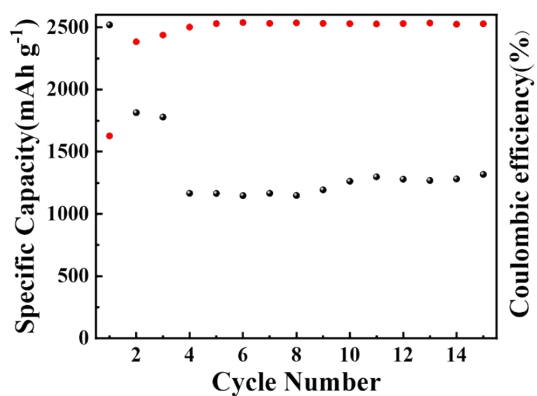

Fig. S13 Si@Void@C-M electrode with a mass loading of  $3.5 mg cm^{-2}$  cycled at  $1 A g^{-1}$ .

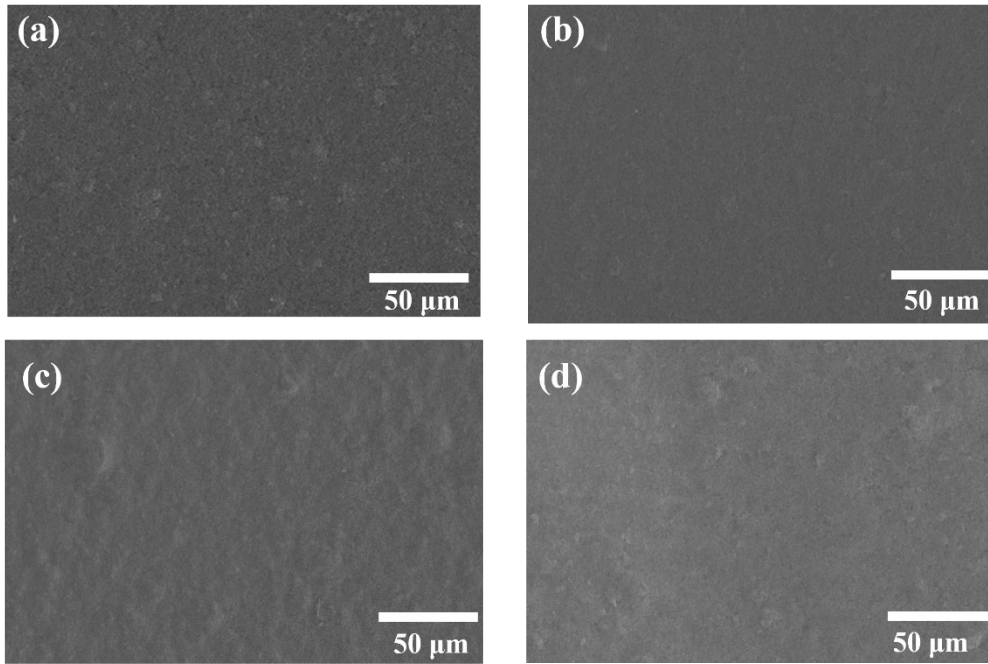

Fig. S14 SEM images of the electrodes before cycle: (a) Si; (b) Si@Void@C-L; (c) Si@Void@C-M; (d) Si@Void@C-H.

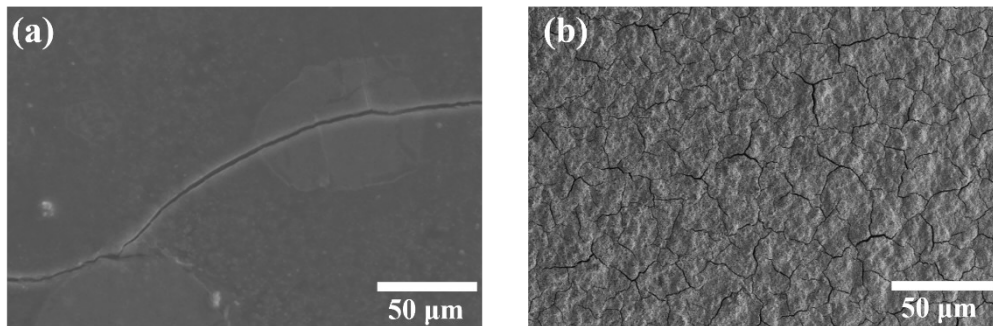

Fig. S15 SEM images of the surface of (a) Si@Void@C-L; (b) Si@Void@C-H electrodes after 500 cycles.

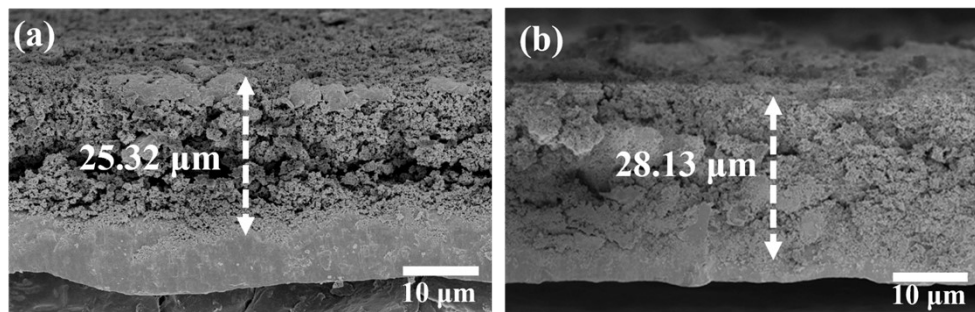

Fig. S16 Cross section of the electrodes before cycle (a) Si@Void@C-L; (b) Si@Void@C-H.

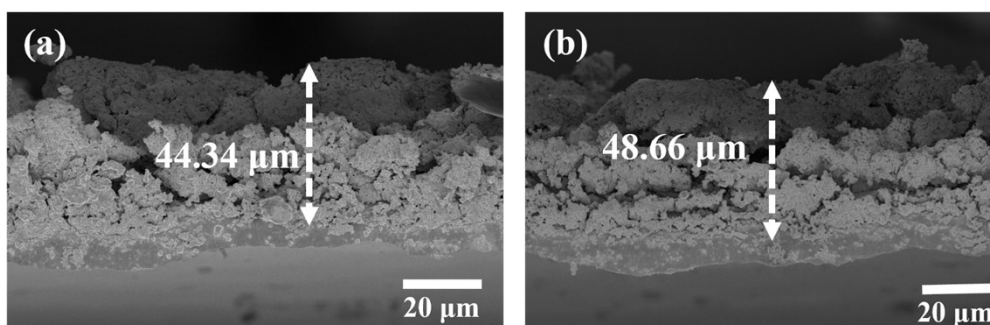

Fig. S17 Cross section of the electrodes after cycle (a) Si@Void@C-L; (b) Si@Void@C-H.

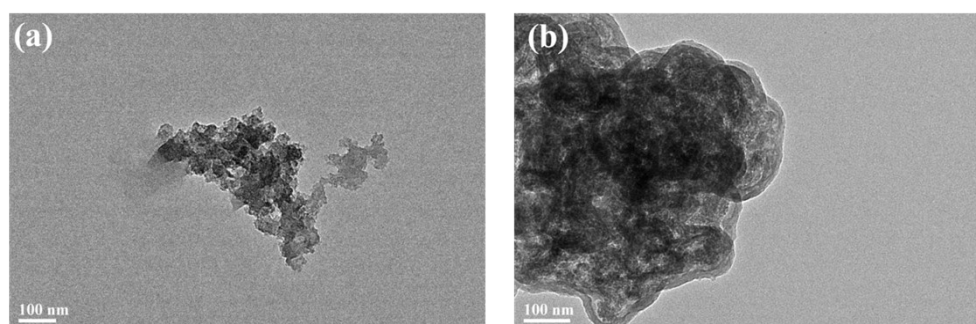

Fig. S18 TEM images of (a) bare Si and (b) Si@Void@C electrodes after cycling.

**Table S1** Zeta potentia potential of silicon modified with different copolymers.

| Sample                                                         | Zeta Potential(mV) |
|----------------------------------------------------------------|--------------------|
| Si                                                             | -29.2              |
| Si@DMA <sub>10</sub> -SBMA <sub>90</sub>                       | 16.6               |
| Si@DMA <sub>10</sub> -DMAEMA <sub>60</sub> -SBMA <sub>30</sub> | 15.8               |
| Si@DMA <sub>10</sub> -DMAEMA <sub>30</sub> -SBMA <sub>60</sub> | 14.3               |
| Si@DMA <sub>10</sub> -DMAEMA <sub>90</sub>                     | 12.6               |

**Table S2** The specific surface area of Si and Si@Void@C.

| Sample           | Si                      | Si@Void@C-L              | Si@Void@C-M              | Si@Void@C-H              |
|------------------|-------------------------|--------------------------|--------------------------|--------------------------|
| BET Surface area | 42.85 m <sup>2</sup> /g | 213.84 m <sup>2</sup> /g | 211.16 m <sup>2</sup> /g | 134.28 m <sup>2</sup> /g |
| Pore volume      | 0.14 cm <sup>3</sup> /g | 0.35 cm <sup>3</sup> /g  | 0.33 cm <sup>3</sup> /g  | 0.26 cm <sup>3</sup> /g  |

**Table S3** The fitted values of resistance components on the basis of the Nyquist plots.

| Sample      | $R_s/\Omega$ | $R_{ct}/\Omega$ |
|-------------|--------------|-----------------|
| Si          | 5.48         | 146.62          |
| Si@Void@C-L | 2.01         | 33.07           |
| Si@Void@C-M | 2.19         | 44.36           |

**Table S4** Comparison of electrochemical performance for Si/C composite materials

| Sample          | Current density (A g <sup>-1</sup> ) | Cycles | Specific Capacity (mAh g <sup>-1</sup> ) | Rate (mAh g <sup>-1</sup> )   | Reference |
|-----------------|--------------------------------------|--------|------------------------------------------|-------------------------------|-----------|
| Si/C-0.70-M     | 0.5                                  | 500    | 557                                      | 988 (2 A g <sup>-1</sup> )    | 1         |
| Si/C-ZIF-8/CNFs | 0.5                                  | 500    | 538.6                                    | 437.4 (5 A g <sup>-1</sup> )  | 2         |
| p-SiNPs@HC-1    | 1.0                                  | 600    | 600                                      | 720 (4 A g <sup>-1</sup> )    | 3         |
| S-Si-C          | 1.0                                  | 400    | 734.8                                    | 1257.4 (2 A g <sup>-1</sup> ) | 4         |
| Si@H-CoNPSC     | 1.0                                  | 300    | 872.8                                    | 599.1 (2 A g <sup>-1</sup> )  | 5         |
| Si@HC           | 1.0                                  | 450    | 721                                      | 753 (2 A g <sup>-1</sup> )    | 6         |
| Si/C            | 0.2                                  | 200    | 584.1                                    | 575.9 (2 A g <sup>-1</sup> )  | 7         |
| Si/0.01C        | 1.0                                  | 173    | 1159                                     | 1010 (2 A g <sup>-1</sup> )   | 8         |
| Si/SWCNT/C/SWCN | 1.0                                  | 200    | 1676.5                                   | 1554.8(3 A g <sup>-1</sup> )  | 9         |
| T               | 0.5                                  | 1000   | 991                                      | 756(3 A g <sup>-1</sup> )     | 10        |
| Si/C HSs        | 1.0                                  | 500    | 992.2                                    | 880.1 (5 A g <sup>-1</sup> )  |           |
| This work       |                                      |        |                                          | 538.9 (10 A g <sup>-1</sup> ) |           |

## Reference

1. S. Fu, J. Zhou, G. Wu, W. Liu, H. Qin, C. Liu, T. Sato, Y. Peng and L. Miao, *Sustainable Materials and Technologies*, 2024, **41**, e01021.
2. Y. Zeng, Y. Huang, N. Liu, X. Wang, Y. Zhang, Y. Guo, H.-H. Wu, H. Chen, X. Tang and Q. Zhang, *Journal of Energy Chemistry*, 2021, **54**, 727-735.
3. S. Guo, X. Hu, Y. Hou and Z. Wen, *ACS Applied Materials & Interfaces*, 2017, **9**, 42084-42092.
4. Y. Qiao, Y. Hu, Z. Qian, M. Qu and Z. Liu, *Journal of Colloid and Interface Science*, 2025, **684**, 678-689.
5. A.-M. Fei, L. Wu, M.-T. Wei, W.-H. Shi, Z. Qian, Z.-B. Qin, H. S. H. Mohamed, Z.-Y. Hu, J. Liu, Y. Li and B.-L. Su, *Applied Surface Science*, 2025, **699**, 163141.
6. X. Xue, B. Lou, C. Wu, W. Pang, J. Zhang, N. Shi, Z. Men, F. Wen, X. Yang, J. Wu, L. Tian and D. Liu, *Chemical Engineering Journal*, 2024, **488**, 150936.
7. W. Liu, J. Liu, M. Zhu, W. Wang, L. Wang, S. Xie, L. Wang, X. Yang, X. He and Y. Sun, *ACS Applied Materials & Interfaces*, 2020, **12**, 57055-57063.
8. J. Chen, X. Wang, Z. Deng, E. M. Kim and S. M. Jeong, *Nanoscale*, 2025, **17**, 6049-6057.
9. Z. Ye, Y. Yu, Y. Jiang, X. Feng, X. Liu, C. Wu and L. Guan, *ACS Applied Nano Materials*, 2026, **9**, 3408-3416.
10. K. Yu, H. Li, Z. Wang, X. Luo, Z. Li, A. Fu, X. Liu, Y.-G. Guo and H. Li, *Applied Surface Science*, 2025, **704**, 163422.
